# Supplementary material
Source: PubMed Central journal article supplement (PMC2947262)

Figure S1:

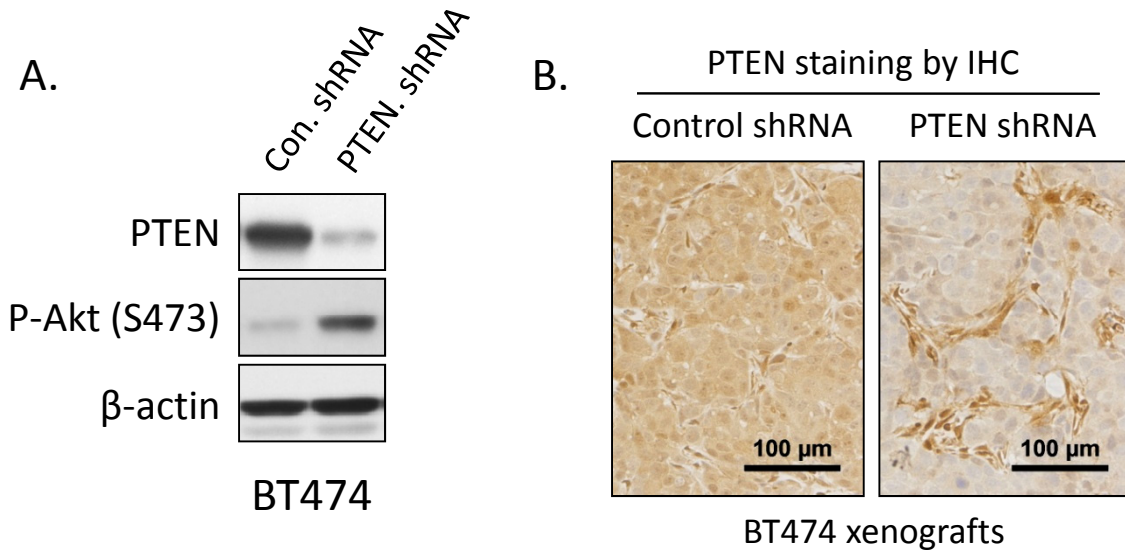

Figure S2:

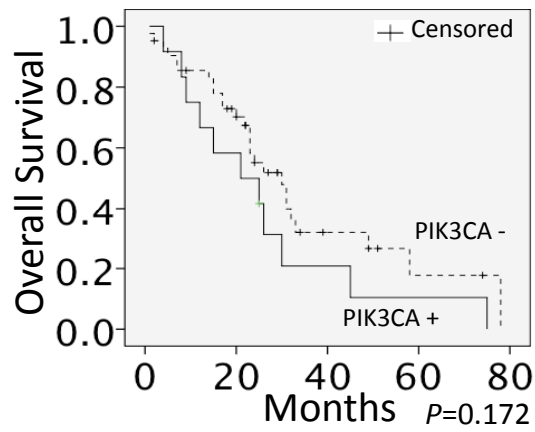

Figure S3:

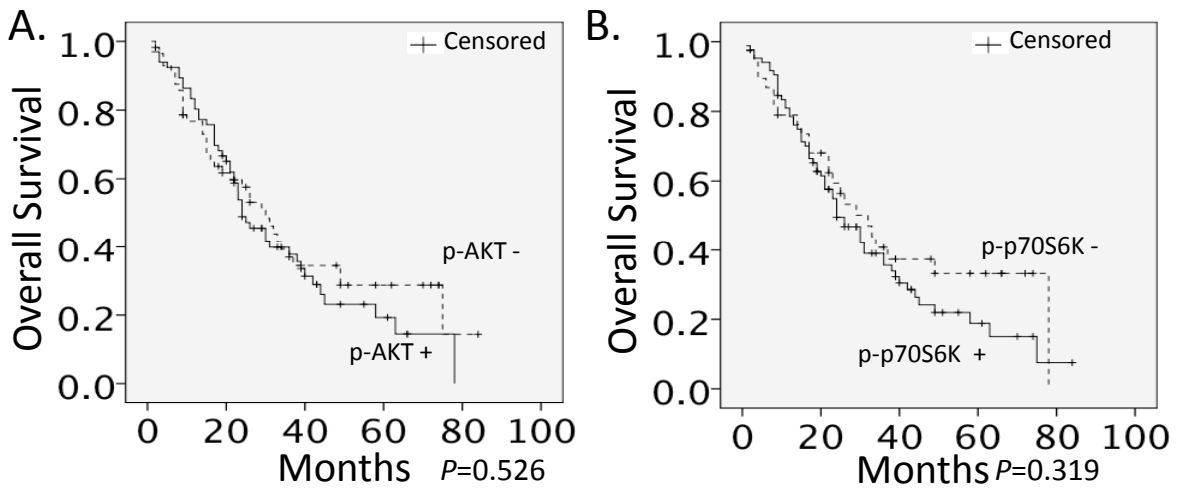

Supplement: mmc1.pdf [file mmc1.pdf]
